# Supplementary material for: A Comprehensive, Quantitative, and Genome-Wide Model of Translation
Source: PubMed Central journal article supplement (PMC2912337; doi:10.1371/journal.pcbi.1000865), 2010-07-29
Supplement: pcbi.1000865.s004.pdf [file pcbi.1000865.s004.pdf]

Table S2: The list of codons and their properties. Column descriptions: (1) codons recognised by a tRNA molecule; (2,3) cognate and near-cognate tRNAs labelled as per Table S4; (4) competition rate  $C$ ; (5) competition rate  $R$ ; and (6,7,8,9) translation times at 20, 24, 30, and 37°C, respectively. All times of translation are in ms.

| codon | cognate_tRNAs | near-cognate_tRNAs | $C$   | $R$    | $e_{20}$ | $e_{24}$ | $e_{30}$ | $e_{37}$ |
|-------|---------------|--------------------|-------|--------|----------|----------|----------|----------|
| AAA   | 24            | 3,7,18,25,34       | 5.82  | 31.51  | 531      | 353      | 215      | 120      |
| AAC   | 7             | 24,25,30           | 2.47  | 23.07  | 279      | 185      | 113      | 63       |
| AAG   | 25            | 4,7,24,26,35       | 1.72  | 16.45  | 208      | 138      | 84       | 47       |
| AAU   | 7             | 19,24,25,36        | 4.42  | 21.12  | 404      | 268      | 163      | 92       |
| ACA   | 34            | 3,18,24,35,36      | 7.94  | 58.89  | 761      | 505      | 307      | 172      |
| ACC   | 36            | 7,30,34,35         | 1.78  | 22.29  | 231      | 153      | 93       | 52       |
| ACG   | 35            | 4,25,26,34,36      | 34.77 | 234.07 | 3121     | 2072     | 1260     | 707      |
| ACU   | 36            | 19,34,35           | 1.68  | 22.39  | 224      | 149      | 91       | 51       |
| AGA   | 3             | 4,18,24,30,34      | 1.67  | 22.39  | 224      | 148      | 90       | 51       |
| AGC   | 30            | 3,4,7              | 5.51  | 61.31  | 605      | 402      | 245      | 137      |
| AGG   | 4             | 3,25,26,30,35      | 34.77 | 234.07 | 3121     | 2072     | 1260     | 707      |
| AGU   | 30            | 3,4,19,36          | 8.95  | 57.88  | 825      | 548      | 333      | 187      |
| AUA   | 18            | 3,19,24,26,34      | 19.79 | 113.39 | 1730     | 1149     | 699      | 392      |
| AUC   | 19            | 7,18,26,30         | 1.61  | 18.03  | 206      | 136      | 83       | 47       |
| AUG   | 26            | 4,18,19,25,35      | 6.30  | 47.26  | 614      | 407      | 248      | 139      |
| AUU   | 19            | 18,26,36           | 1.36  | 18.29  | 190      | 126      | 77       | 43       |
| CAA   | 10            | 11,17,20,28        | 2.32  | 26.17  | 279      | 185      | 113      | 63       |
| CAC   | 17            | 10,11,21           | 1.58  | 35.75  | 260      | 173      | 105      | 59       |
| CAG   | 11            | 5,10,17            | 17.19 | 251.65 | 1997     | 1326     | 806      | 452      |
| CAU   | 17            | 6,10,11,29         | 2.57  | 34.77  | 323      | 215      | 131      | 73       |
| CCA   | 28            | 10,20,29           | 1.39  | 24.15  | 210      | 140      | 85       | 48       |
| CCC   | 29            | 17,21,28           | 9.05  | 124.13 | 1044     | 693      | 421      | 236      |
| CCG   | 28            | 5,11,29            | 0.39  | 25.15  | 146      | 97       | 59       | 33       |
| CCU   | 29            | 6,28               | 7.99  | 125.19 | 976      | 648      | 394      | 221      |
| CGA   | 6             | 5,10,20,28         | 3.95  | 40.76  | 435      | 289      | 176      | 99       |
| CGC   | 6             | 5,17,21            | 1.53  | 43.18  | 280      | 186      | 113      | 64       |
| CGG   | 5             | 6,11               | 6.90  | 261.93 | 1339     | 889      | 541      | 303      |
| CGU   | 6             | 5,29               | 0.51  | 44.20  | 215      | 143      | 87       | 49       |
| CUA   | 20            | 10,21,28           | 6.77  | 82.17  | 757      | 502      | 306      | 171      |
| CUC   | 21            | 17,20              | 10.04 | 258.80 | 1540     | 1022     | 622      | 349      |
| CUG   | 20            | 5,11,21            | 1.00  | 87.95  | 388      | 257      | 157      | 88       |
| CUU   | 21            | 6,20,29            | 10.91 | 257.92 | 1595     | 1059     | 644      | 361      |
| GAA   | 12            | 1,8,13,14,39       | 1.93  | 16.24  | 221      | 147      | 89       | 50       |
| GAC   | 8             | 12,13,16           | 2.15  | 14.55  | 231      | 153      | 93       | 52       |
| GAG   | 13            | 8,12,15,40         | 16.58 | 116.60 | 1525     | 1012     | 616      | 345      |
| GAU   | 8             | 2,12,13,41         | 2.68  | 14.01  | 265      | 176      | 107      | 60       |
| GCA   | 1             | 2,12,14,39         | 6.04  | 47.52  | 597      | 396      | 241      | 135      |
| GCC   | 2             | 1,8,16             | 3.42  | 20.65  | 335      | 223      | 135      | 76       |
| GCG   | 1             | 2,13,15,40         | 3.40  | 50.16  | 428      | 284      | 173      | 97       |
| GCU   | 2             | 1,41               | 1.77  | 22.30  | 230      | 153      | 93       | 52       |
| GGA   | 14            | 1,12,15,16,39      | 13.23 | 75.72  | 1170     | 777      | 472      | 265      |
| GGC   | 16            | 8,14,15            | 1.22  | 14.00  | 167      | 111      | 67       | 38       |
| GGG   | 15            | 13,14,16,40        | 11.76 | 121.42 | 1217     | 808      | 491      | 276      |
| GGU   | 16            | 2,14,15,41         | 1.79  | 13.43  | 203      | 135      | 82       | 46       |
| GUA   | 39            | 1,12,14,40,41      | 18.95 | 114.23 | 1677     | 1113     | 677      | 380      |
| GUC   | 41            | 8,16,39,40         | 2.55  | 15.62  | 261      | 173      | 105      | 59       |
| GUG   | 40            | 13,15,39,41        | 10.00 | 123.18 | 1104     | 733      | 446      | 250      |
| GUU   | 41            | 2,39,40            | 1.05  | 17.12  | 165      | 110      | 67       | 37       |
| UAC   | 38            | 9,27               | 1.78  | 31.14  | 259      | 172      | 105      | 59       |
| UAU   | 38            | 33                 | 1.35  | 31.56  | 231      | 154      | 93       | 52       |
| UCA   | 31            | 22,32,33           | 6.27  | 82.68  | 725      | 481      | 293      | 164      |
| UCC   | 33            | 9,27,31,32,38      | 2.42  | 21.64  | 271      | 180      | 110      | 61       |
| UCG   | 32            | 23,31,33,37        | 29.83 | 239.00 | 2805     | 1862     | 1133     | 635      |
| UCU   | 33            | 31,32              | 0.37  | 23.70  | 140      | 93       | 57       | 32       |
| UGC   | 9             | 27,37,38           | 6.04  | 60.79  | 639      | 424      | 258      | 145      |
| UGG   | 37            | 9,23,32            | 2.57  | 42.14  | 347      | 230      | 140      | 79       |
| UGU   | 9             | 33,37              | 4.19  | 62.64  | 521      | 346      | 210      | 118      |
| UUA   | 22            | 23,27,31           | 3.32  | 34.02  | 371      | 247      | 150      | 84       |
| UUC   | 27            | 9,22,23,38         | 2.87  | 22.67  | 305      | 202      | 123      | 69       |
| UUG   | 23            | 22,27,32,37        | 2.37  | 23.17  | 273      | 181      | 110      | 62       |
| UUU   | 27            | 22,23,33           | 2.75  | 22.79  | 297      | 197      | 120      | 67       |
