# Supplementary material for: A Comprehensive, Quantitative, and Genome-Wide Model of Translation
Source: PubMed Central journal article supplement (PMC2912337; doi:10.1371/journal.pcbi.1000865), 2010-07-29
Supplement: pcbi.1000865.s005.pdf [file pcbi.1000865.s005.pdf]

Table S3: The translational parameters calculated for 14 genes coding proteins of the 20S yeast proteasome. Row descriptions: (gene) systematic name of the gene; (subunit) name of the corresponding proteasomal subunit; (L) length of the coding sequence in codons; (x) number of transcripts per cell; (B) number of synthesised protein molecules per cell; (g) ribosome density in ribosomes per 100 codons; (w) absolute number of ribosomes per transcript; (P) translation initiation frequency (the inverse of I); (Pz) the relative rate of binding of free ribosomes to the 5' end of a transcript; (Ps) the relative, normalised rate of a successful accomplishment of translation initiation once the ribosome-mRNA complex is formed; (T) total time of translation of one protein molecule from a given transcript in clock notation (min:sec); (I) total time required for translation initiation in clock notation (min:sec); (E) total time required for translation elongation of a transcript in clock notation (min:sec); (mean\_E) mean time required for elongation of one codon of a transcript in sec; (h) estimated half-life of a transcript in clock notation (h:min:sec); and (m) estimated mean life-time of a transcript in clock notation (h:min:sec).

| gene    | YGL011C | YML092C | YGR135W | YOL038W | YGR253C | YMR314W | YOR362C |
|---------|---------|---------|---------|---------|---------|---------|---------|
| subunit | alpha-1 | alpha-2 | alpha-3 | alpha-4 | alpha-5 | alpha-6 | alpha-7 |
| L       | 253     | 251     | 259     | 255     | 261     | 235     | 289     |
| x       | 5.12    | 8.95    | 20.43   | 16.19   | 16.20   | 14.03   | 13.06   |
| B       | 3488    | 5481    | 972     | 624     | 318     | 1038    | 3076    |
| g       | 2.77    | 1.64    | 0.77    | 0.76    | 1.40    | 1.03    | 0.8     |
| w       | 7.01    | 4.11    | 1.99    | 1.94    | 3.67    | 2.42    | 2.34    |
| P       | 1.3e-04 | 7.2e-05 | 3.7e-05 | 2.9e-05 | 6.4e-05 | 4.6e-05 | 4.1e-05 |
| Pz      | 1.4e-04 | 2.5e-04 | 5.7e-04 | 4.5e-04 | 4.5e-04 | 3.9e-04 | 3.6e-04 |
| Ps      | 1.4e-02 | 4.4e-03 | 9.9e-04 | 9.9e-04 | 2.2e-03 | 1.8e-03 | 1.7e-03 |
| T       | 0:59    | 1:11    | 1:21    | 1:40    | 1:13    | 1:14    | 1:23    |
| I       | 0:07    | 0:14    | 0:27    | 0:34    | 0:16    | 0:22    | 0:25    |
| E       | 0:52    | 0:57    | 0:54    | 1:06    | 0:57    | 0:52    | 0:58    |
| mean_E  | 0.206   | 0.227   | 0.208   | 0.259   | 0.219   | 0.223   | 0.199   |
| h       | 0:58:27 | 1:37:57 | 0:14:52 | 0:15:10 | 0:03:32 | 0:18:32 | 1:06:56 |
| m       | 1:24:20 | 2:21:19 | 0:21:26 | 0:21:53 | 0:05:06 | 0:26:44 | 1:36:34 |
| gene    | YJL001W | YOR157C | YER094C | YER012W | YPR103W | YBL041W | YFR050C |
| subunit | beta-1  | beta-2  | beta-3  | beta-4  | beta-5  | beta-6  | beta-7  |
| L       | 216     | 262     | 206     | 199     | 288     | 242     | 267     |
| x       | 16.64   | 3.99    | 22.61   | 4.09    | 14.08   | 7.15    | 9.41    |
| B       | 11185   | 2581    | 2468    | 2674    | 2670    | 1657    | 3549    |
| g       | 0.86    | 4.32    | 0.61    | 3.02    | 0.83    | 2.21    | 1.42    |
| w       | 1.86    | 11.31   | 1.26    | 6.01    | 2.39    | 5.35    | 3.80    |
| P       | 3.9e-05 | 1.8e-04 | 2.7e-05 | 1.4e-04 | 4.3e-05 | 1.0e-04 | 6.7e-05 |
| Pz      | 4.6e-04 | 1.1e-04 | 6.3e-04 | 1.1e-04 | 3.9e-04 | 2.0e-04 | 2.6e-04 |
| Ps      | 1.3e-03 | 2.6e-02 | 6.6e-04 | 1.9e-02 | 1.7e-03 | 7.9e-03 | 3.9e-03 |
| T       | 1:12    | 1:05    | 1:22    | 0:49    | 1:19    | 1:01    | 1:11    |
| I       | 0:25    | 0:05    | 0:36    | 0:07    | 0:23    | 0:10    | 0:15    |
| E       | 0:47    | 1:00    | 0:46    | 0:42    | 0:56    | 0:51    | 0:56    |
| mean_E  | 0.218   | 0.228   | 0.223   | 0.209   | 0.194   | 0.213   | 0.212   |
| h       | 3:16:42 | 0:39:32 | 0:45:47 | 0:52:24 | 0:51:19 | 0:25:48 | 1:04:52 |
| m       | 4:43:48 | 0:57:03 | 1:06:03 | 1:15:36 | 1:14:02 | 0:37:33 | 1:33:34 |
