# Supplementary material for: A Comprehensive, Quantitative, and Genome-Wide Model of Translation
Source: PubMed Central journal article supplement (PMC2912337; doi:10.1371/journal.pcbi.1000865), 2010-07-29
Supplement: pcbi.1000865.s006.pdf [file pcbi.1000865.s006.pdf]

Table S4: Decoding specificities of yeast tRNAs (determined by [63]) and calculated values of the model parameters for particular codons. Column descriptions: (1) tRNA number; (2) codons recognised by a tRNA molecule; (3) tRNA anticodon; (4) coded amino acid; (5) number of tRNA genes; (6) number of tRNA genes divided by 274 - the total number of tRNA genes in the yeast genome; (7) diffusion coefficient of a aa-tRNA molecule in  $10^{-11} \text{ m}^2/\text{sec}$  (taken from [60]); (8) the number of tRNA molecules in a yeast cell; (9) characteristic time  $\tau$  of a aa-tRNA molecule moving from one occupation site of a cell to the other in  $10^{-5}$  seconds; and (10) time  $t$  that elapses before the arrival of a aa-tRNA molecule to the vacant A site of a ribosome in seconds.

| nr | codon       | anti-codon | amino-acid | nr genes | fr    | diff coeff | mol cell | $\tau$ | $t$    |
|----|-------------|------------|------------|----------|-------|------------|----------|--------|--------|
| 1  | GCA,GCG     | UGC        | Ala        | 5        | 0.018 | 0.2571     | 51437    | 1.3588 | 0.0037 |
| 2  | GCU,GCC     | IGC        | Ala        | 11       | 0.040 | 0.2571     | 113163   | 1.3588 | 0.0017 |
| 3  | AGA         | UCU        | Arg        | 11       | 0.040 | 0.2568     | 113163   | 1.3604 | 0.0017 |
| 4  | AGG         | CCU        | Arg        | 1        | 0.004 | 0.2568     | 10289    | 1.3604 | 0.0183 |
| 5  | CGG         | CCG        | Arg        | 1        | 0.004 | 0.2568     | 10289    | 1.3604 | 0.0183 |
| 6  | CGU,CGC,CGA | ICG        | Arg        | 6        | 0.022 | 0.2568     | 61726    | 1.3604 | 0.0031 |
| 7  | AAU,AAC     | GUU        | Asn        | 10       | 0.036 | 0.2570     | 102875   | 1.3593 | 0.0018 |
| 8  | GAU,GAC     | GUC        | Asp        | 15       | 0.055 | 0.2570     | 154315   | 1.3593 | 0.0012 |
| 9  | UGU,UGC     | GCA        | Cys        | 4        | 0.015 | 0.2570     | 41152    | 1.3593 | 0.0046 |
| 10 | CAA         | UUG        | Gln        | 9        | 0.033 | 0.2569     | 92589    | 1.3598 | 0.0020 |
| 11 | CAG         | CUG        | Gln        | 1        | 0.004 | 0.2569     | 10289    | 1.3598 | 0.0183 |
| 12 | GAA         | UUC        | Glu        | 14       | 0.051 | 0.2569     | 144026   | 1.3598 | 0.0013 |
| 13 | GAG         | CUC        | Glu        | 2        | 0.007 | 0.2569     | 20574    | 1.3598 | 0.0091 |
| 14 | GGA         | UCC        | Gly        | 3        | 0.011 | 0.2572     | 30863    | 1.3583 | 0.0061 |
| 5  | GGG         | CCC        | Gly        | 2        | 0.007 | 0.2572     | 20574    | 1.3583 | 0.0091 |
| 16 | GGU,GGC     | GCC        | Gly        | 16       | 0.058 | 0.2572     | 164601   | 1.3583 | 0.0011 |
| 17 | CAU,CAC     | GUG        | His        | 7        | 0.026 | 0.2569     | 72012    | 1.3598 | 0.0026 |
| 18 | AUA         | UAU        | Ile        | 2        | 0.007 | 0.2570     | 20574    | 1.3593 | 0.0091 |
| 19 | AUC,AUU     | IAU        | Ile        | 13       | 0.047 | 0.2570     | 133738   | 1.3593 | 0.0014 |
| 20 | CUA,CUG     | UAG        | Leu        | 3        | 0.011 | 0.2570     | 30863    | 1.3593 | 0.0061 |
| 21 | CUC,CUU     | GAG        | Leu        | 1        | 0.004 | 0.2570     | 10289    | 1.3593 | 0.0183 |
| 22 | UUA         | UAA        | Leu        | 7        | 0.026 | 0.2570     | 72012    | 1.3593 | 0.0026 |
| 23 | UUG         | CAA        | Leu        | 10       | 0.036 | 0.2570     | 102875   | 1.3593 | 0.0018 |
| 24 | AAA         | UUU        | Lys        | 7        | 0.026 | 0.2569     | 72012    | 1.3598 | 0.0026 |
| 25 | AAG         | CUU        | Lys        | 14       | 0.051 | 0.2569     | 144026   | 1.3598 | 0.0013 |
| 26 | AUG         | CAU        | Met        | 5        | 0.018 | 0.2569     | 51437    | 1.3598 | 0.0037 |
| 27 | UUU,UUC     | GAA        | Phe        | 10       | 0.036 | 0.2568     | 102875   | 1.3604 | 0.0018 |
| 28 | CCA,CCG     | UGG        | Pro        | 10       | 0.036 | 0.2570     | 102875   | 1.3593 | 0.0018 |
| 29 | CCU,CCC     | IGG        | Pro        | 2        | 0.007 | 0.2570     | 20574    | 1.3593 | 0.0091 |
| 30 | AGU,AGC     | GCU        | Ser        | 4        | 0.015 | 0.2571     | 41152    | 1.3588 | 0.0046 |
| 31 | UCA         | UGA        | Ser        | 3        | 0.011 | 0.2571     | 30863    | 1.3588 | 0.0061 |
| 32 | UCG         | CGA        | Ser        | 1        | 0.004 | 0.2571     | 10289    | 1.3588 | 0.0183 |
| 33 | UCU,UCC     | IGA        | Ser        | 11       | 0.040 | 0.2571     | 113163   | 1.3588 | 0.0017 |
| 34 | ACA         | UGU        | Thr        | 4        | 0.015 | 0.2570     | 41152    | 1.3593 | 0.0046 |
| 35 | ACG         | CGU        | Thr        | 1        | 0.004 | 0.2570     | 10289    | 1.3593 | 0.0183 |
| 36 | ACU,ACC     | IGU        | Thr        | 11       | 0.040 | 0.2570     | 113163   | 1.3593 | 0.0017 |
| 37 | UGG         | CCA        | Trp        | 6        | 0.022 | 0.2567     | 61726    | 1.3609 | 0.0031 |
| 38 | UAU,UAC     | GUA        | Tyr        | 8        | 0.029 | 0.2568     | 82300    | 1.3604 | 0.0023 |
| 39 | GUA         | UAC        | Val        | 2        | 0.007 | 0.2570     | 20574    | 1.3593 | 0.0091 |
| 40 | GUG         | CAC        | Val        | 2        | 0.007 | 0.2570     | 20574    | 1.3593 | 0.0091 |
| 41 | GUU,GUC     | IAC        | Val        | 14       | 0.051 | 0.2570     | 144026   | 1.3593 | 0.0013 |
